# Supplementary material
Source: MDPI journal article supplement (https://www.mdpi.com/2073-4468/10/1/7)

Fig. S1

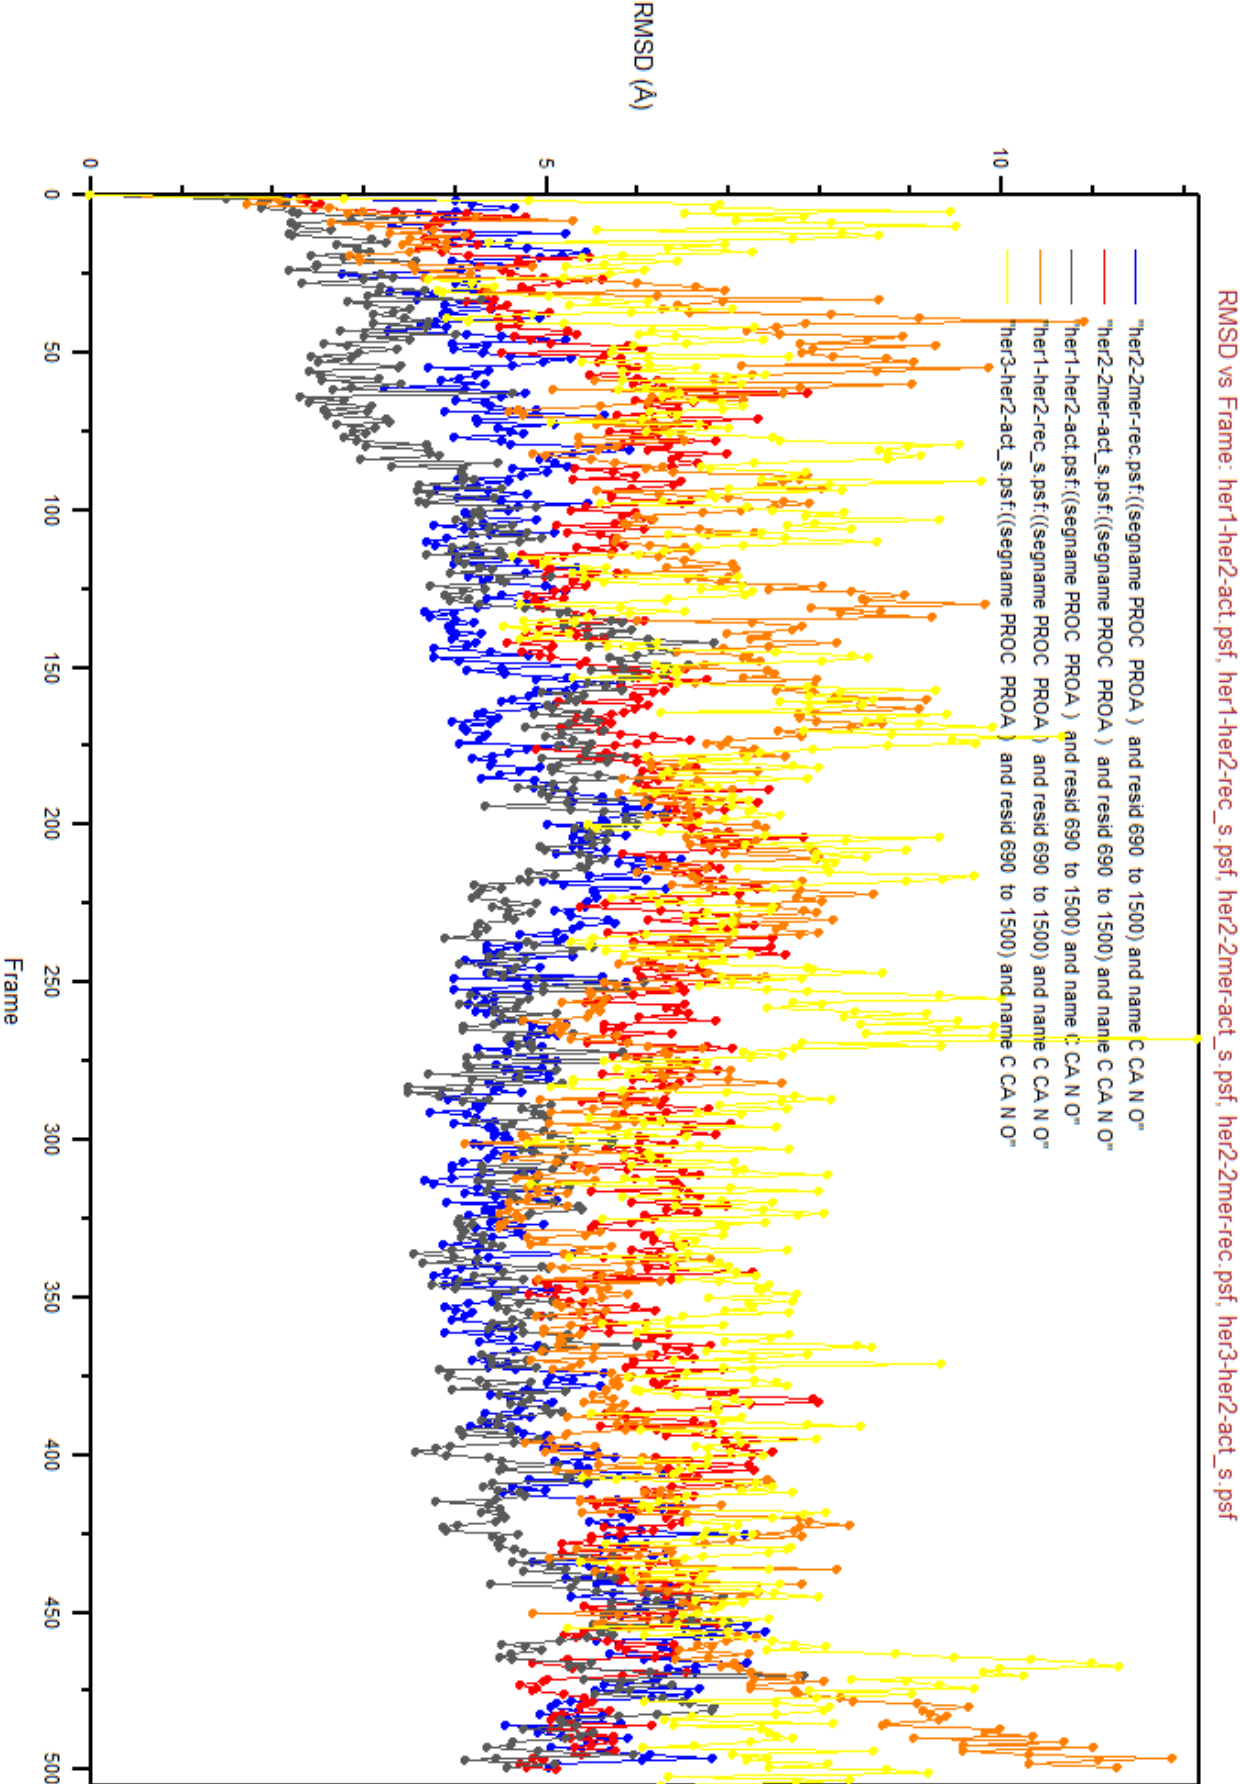

Fig. S2

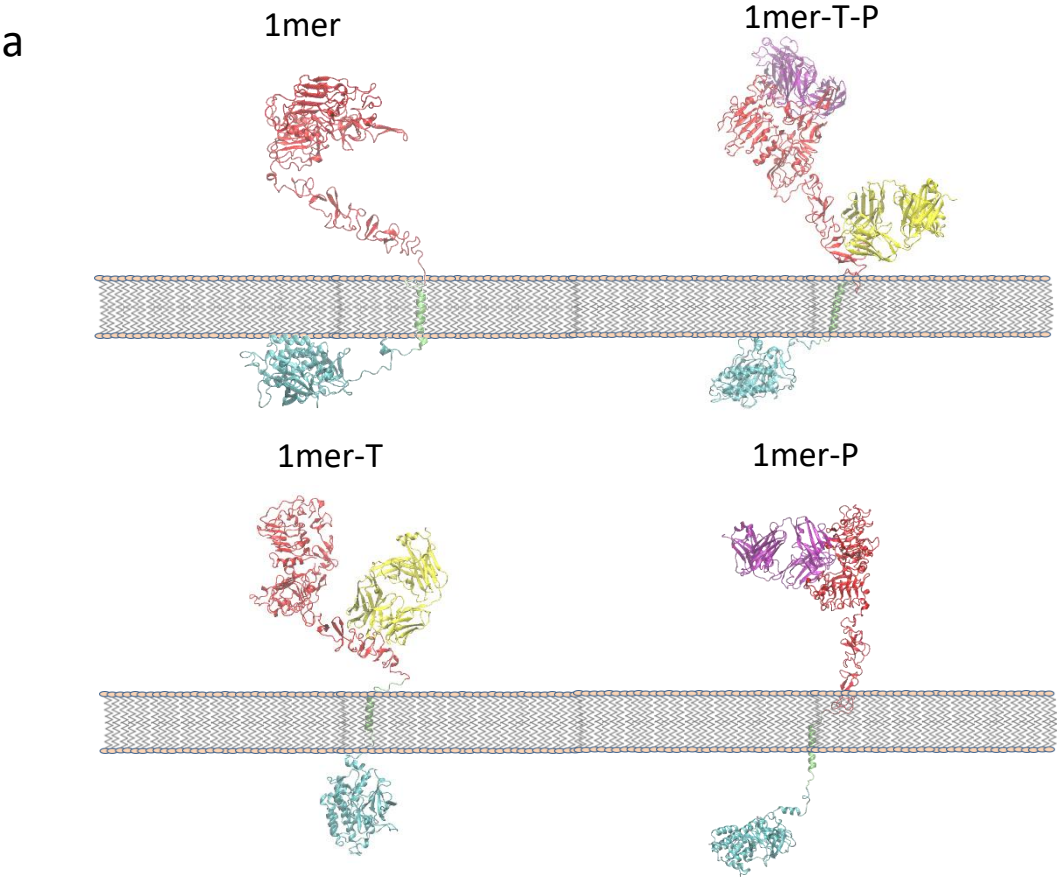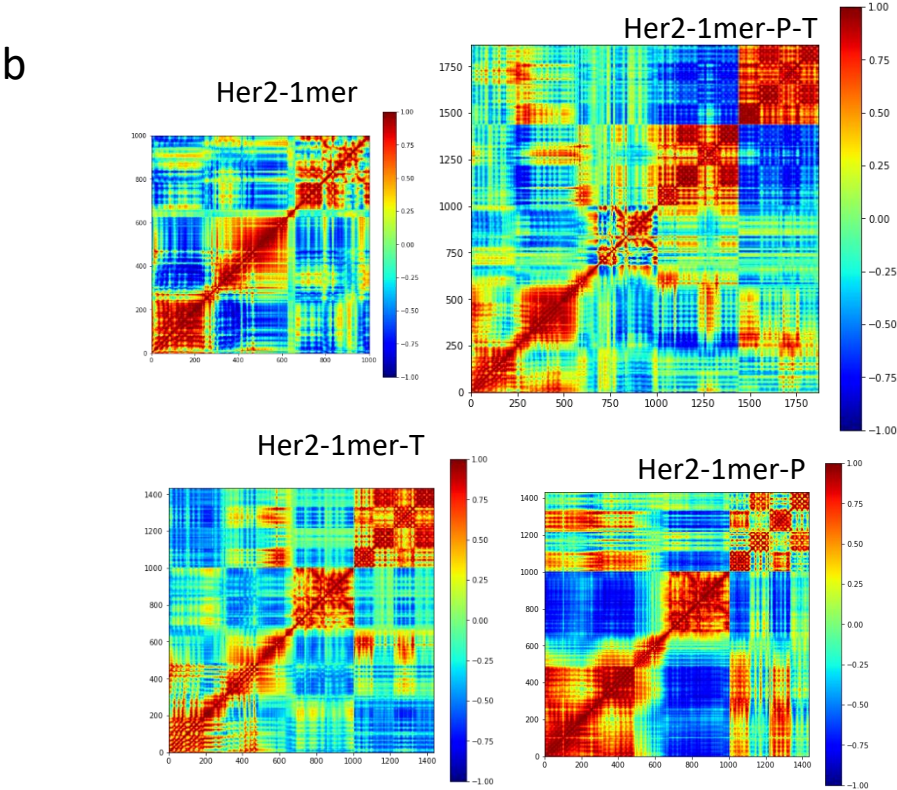

Supplement: s1 [file s1]
